# Supplementary material for: Synthesis of four- and six-armed star-shaped polycarbonates by immortal alternating copolymerization of CO2 and propylene oxide
Source: Royal Society of Chemistry journal article supplement (doi:10.1039/c6py00558f), 2016-01-01
Supplement: c6py00558f1.pdf [file c6py00558f1.pdf]

**Supporting Information**

Synthesis of Four- and Six-Armed Star-Shaped Polycarbonates by *Immortal*

Alternating Copolymerization of CO<sub>2</sub> and Propylene Oxide.

*Hiroshi Sugimoto\**, *Hidetoshi Goto*, *Satoshi Honda*, *Rumi Yamada*, *Yoshihisa Manabe*, and *Shinya Handa*

*Department of Industrial Chemistry, Faculty of Engineering, Tokyo University of Science,  
12-1 Ichigaya-Funagawara-machi, Shinjuku-ku, Tokyo 162-0826, Japan*

\*E-mail: [hrssgmt@rs.kagu.tus.ac.jp](mailto:hrssgmt@rs.kagu.tus.ac.jp)

**Scheme S1.** Synthesis of four-armed star PPC initiated from **2**.

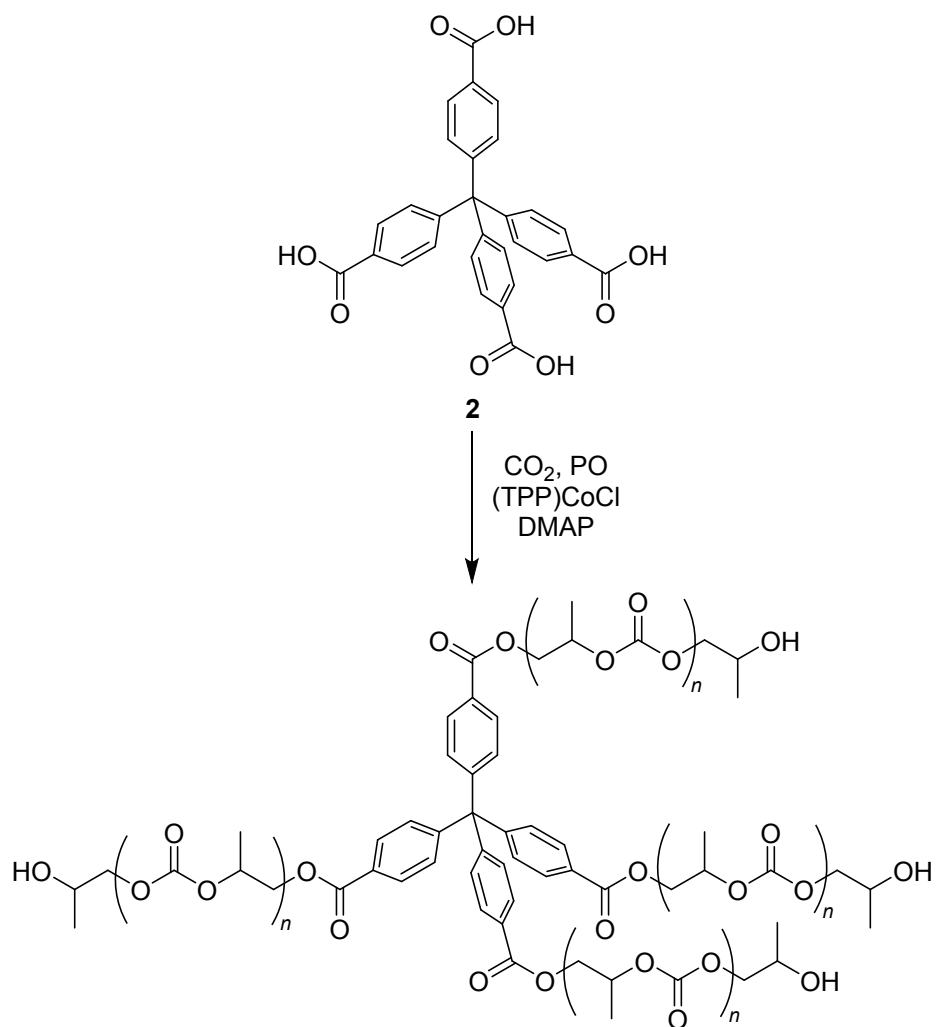

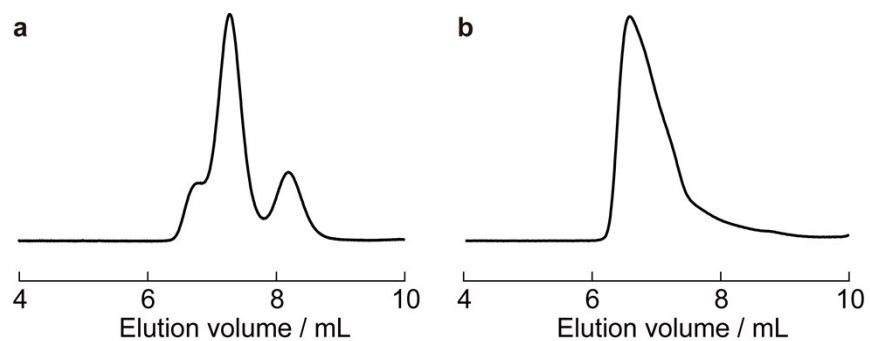

**Figure S1.** GPC chromatograms of the copolymerized product initiated from **2** (Table 1, entry 3) analyzed using RI (a) and UV (b) detectors.

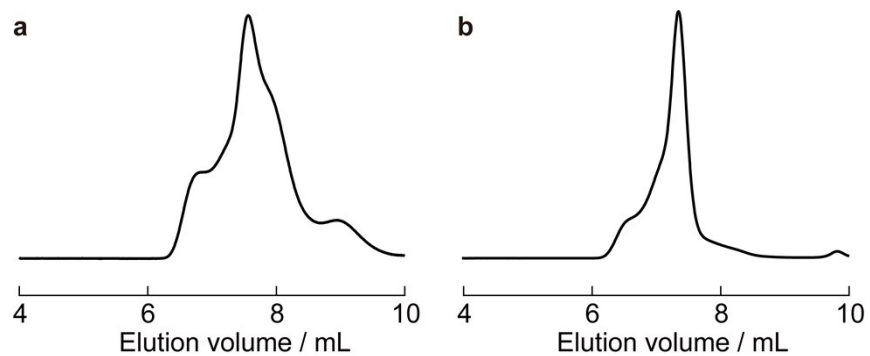

**Figure S2.** GPC chromatograms of the copolymerized product initiated from **3** (Table 1, entry 4) analyzed using RI (a) and UV (b) detectors.

**Scheme S2.** CO<sub>2</sub>-PO alternating copolymerization initiated from trimesic acid.

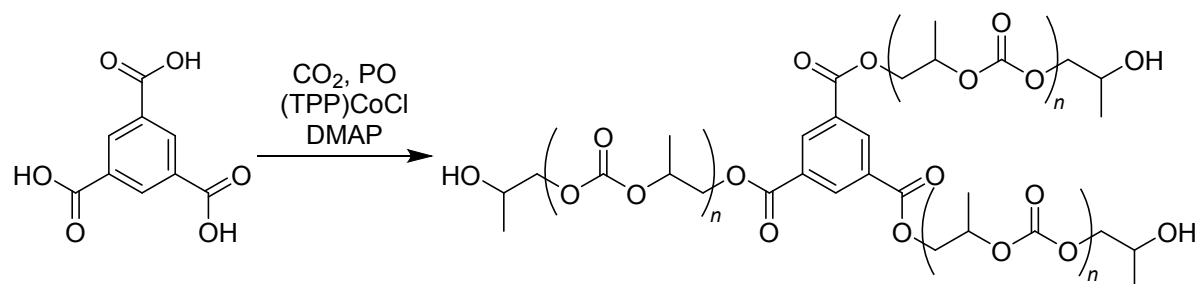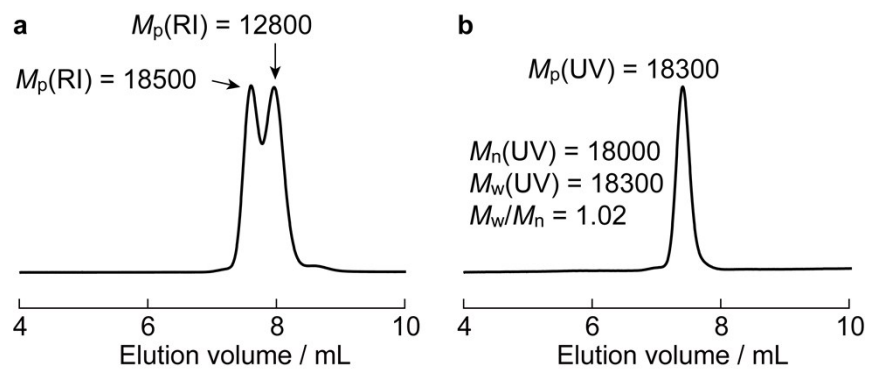

**Figure S3.** GPC chromatograms of the copolymerized product initiated from trimesic acid analyzed using RI (a) and UV (b) detectors.
